# Supplementary material
Source: publisher figshare collection journal article supplement (https://aacr.figshare.com/articles/dataset/_/22430335)
Supplement: Supplementary file 1 [file 39876667]

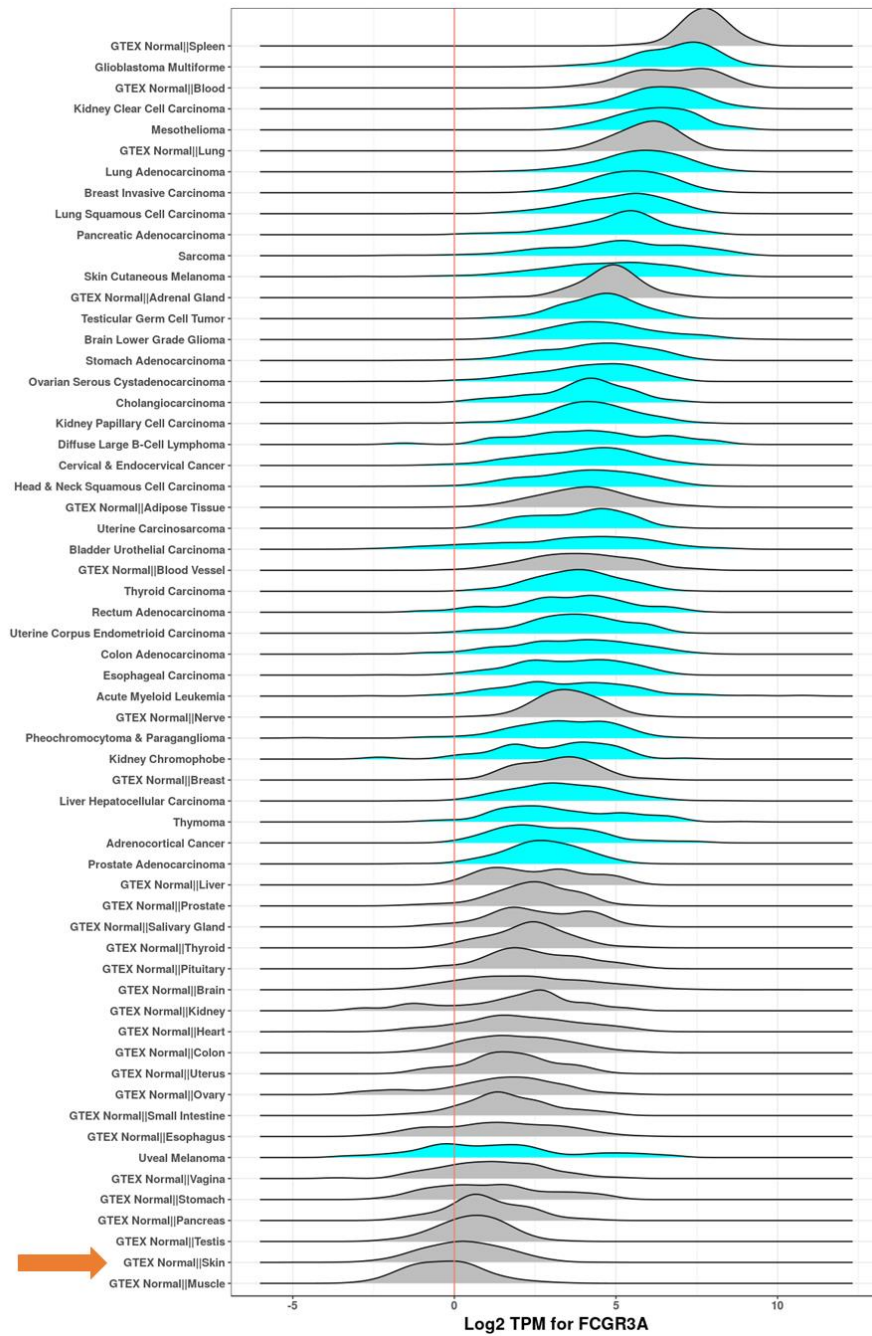

**Supplemental Figure 6: Fc receptor expression in human normal and tumor tissues**  
 CD16 expression in normal (grey) and tumor (blue) tissues from GTEXT and TCGA databases, respectively. Orange arrow highlighting normal skin expression of CD16.
